# Supplementary material for: Moringa oleifera leaves protein suppresses T-lymphoblastic leukemogenesis via MAPK/AKT signaling modulation of apoptotic activation and autophagic flux regulation
Source: Frontiers journal article supplement (doi:10.3389/fimmu.2025.1546189), 2025-04-01
Supplement: Image_1.pdf [file Image_1.pdf]

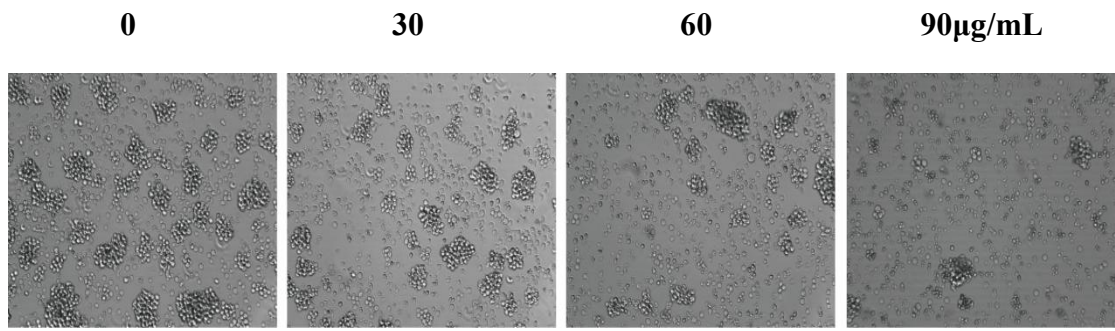

Supplementary Figure S1. The effect of *Moringa oleifera* leaves protein on the morphological changes of Jurkat cells.
